# Supplementary material
Source: PubMed Central journal article supplement (PMC8749710)
Supplement: jama-e2123641-s002.pdf [file jama-e2123641-s002.pdf]

## Supplemental Online Content

Spitzer A, Angel Y, Marudi O, et al. Association of a third dose of BNT162b2 vaccine with incidence of SARS-CoV-2 infection among health care workers. *JAMA*. Published online January 10, 2021. doi:10.1001/jama.2021.23641

### eMethods

eTable 1. Candidate Covariates for Inclusion in the Cox Regression Analysis

eTable 2. Characteristics of SARS-CoV-2 positive participants (n=44)

eTable 3. Baseline Characteristics Stratified by Booster Dose Receipt Status

eFigure 1. SARS-CoV-2 Spread in Israel Throughout the Study Period

eFigure 2. Vaccine Uptake Over Time in Booster Cohort

eFigure 3. Daily PCR Test Density

eFigure 4. Cumulative Number of Positive PCR Tests Over Time From Study Initiation

eFigure 5. Cox Model Diagnostics

eFigure 6. Cumulative Incidence of Symptomatic SARS-CoV-2 Infections

eFigure 7. Cumulative Incidence of SARS-CoV-2 Asymptomatic Infection

eReference

This supplemental material has been provided by the authors to give readers additional information about their work.

## **eMethods**

### **Laboratory methods**

SARS-Cov-2 was detected in nasopharyngeal specimens using reverse-transcriptase polymerase chain reaction (RT-PCR). The following assays were used at the hospital's clinical virology laboratory: 1) the Seegene Allplex™ 2019-nCoV assay, targeting the E, N and RdRP genes; 2) the cobas® SARS-CoV-2 assay, targeting the E and the ORF genes; 3) the Xpert® Xpress SARS-CoV-2, targeting the E and the N genes; 4) the Simplexa™ COVID-19 Direct assay, targeting the S and the ORF genes.

Cycle threshold values of each gene were documented and values of <30 were considered a positive result.

Serologic testing for anti-spike protein receptor binding domain (anti-S1 RBD) IgG were performed using indirect chemiluminescent microparticle immunoassay on the ADVIA Centaur XP system (Siemens, Tarrytown, NY). Antibody levels are presented as an index value. A conversion factor between Index Values and the WHO binding antibody units (BAU/mL) has been established: 1.00 Index on the sCOVG Assay would have a WHO BAU/mL value of 21.8<sup>1</sup>.

### **External R packages**

Cox regression and Kaplan-Meier analysis were implemented with R's survival and survminer packages.

**eTable 1.**

Candidate covariates for inclusion in the Cox regression analysis. Only the covariates with a statistically significant contribution were included in the final regression model. For categorical variables, the first value represents the baseline level.

| <b>Covariate name</b>                            | <b>Variable type</b>                                                               | <b>Chisq</b> | <b>Df</b> | <b>P(&gt; Chi )</b> | <b>Significant</b> |
|--------------------------------------------------|------------------------------------------------------------------------------------|--------------|-----------|---------------------|--------------------|
| Baseline serology titer                          | Categorical (Low, High)                                                            | 5.5          | 1         | 0.01                | *                  |
| Age                                              | Continuous                                                                         | 0.17         | 1         | 0.7                 |                    |
| Age group                                        | Categorical (<30, 30-39, 40-49, 50-59, 60+)                                        | 6.3          | 4         | 0.2                 |                    |
| Sex                                              | Categorical (Female, Male)                                                         | 0.48         | 1         | 0.5                 |                    |
| Marital status                                   | Categorical (Single, Married, Divorced, Widow)                                     | 1.4          | 3         | 0.7                 |                    |
| Number of children                               | Continuous                                                                         | 6.8          | 1         | 0.009               | *                  |
| Employment sector                                | Categorical (Administration, Medicine, Nursing, Other health profession, Research) | 5.6          | 4         | 0.2                 |                    |
| Employment risk level                            | Categorical (Low, Medium, High)                                                    | 0.02         | 2         | 0.99                |                    |
| Number of influenza vaccinations in past 3 years | Categorical (0, 1, 2, 3)                                                           | 3.4          | 3         | 0.3                 |                    |
| Month of 2nd dose receipt                        | Categorical (January, February-May)                                                | 10.8         | 1         | 0.001               | *                  |
| Number of PCR tests in each exposure state       | Continuous                                                                         | 8.1          | 1         | 0.004               | *                  |
| BMI                                              | Continuous                                                                         | 2.8          | 1         | 0.09                |                    |
| Smoking                                          | Categorical (Never, Past, Current)                                                 | 1.2          | 2         | 0.55                |                    |
| Day of enrollment to the study                   | Continuous                                                                         | 1.1          | 1         | 0.3                 |                    |

**eTable 2.** Characteristics of SARS-CoV-2 positive participants (n=44).

|                                                      |                      |
|------------------------------------------------------|----------------------|
| No. of participants                                  | 44                   |
| Symptomatic (%)                                      | 31 (70.4)            |
| Female sex (%)                                       | 31 (70.4)            |
| Male sex (%)                                         | 13 (29.5)            |
| Age (median [IQR])                                   | 43.00 [34.00, 47.50] |
| Age group (%)                                        |                      |
| <30                                                  | 5 (11.4)             |
| 30-39                                                | 10 (22.7)            |
| 40-49                                                | 20 (45.5)            |
| 50-59                                                | 8 (18.2)             |
| 60+                                                  | 1 (2.3)              |
| Marital status (%)                                   |                      |
| Married                                              | 28 (63.6)            |
| Single                                               | 12 (27.3)            |
| Divorced                                             | 4 (9.1)              |
| Widow                                                | 0 (0.0)              |
| No. of children (mean (SD))                          | 2.09 (1.74)          |
| Employment sector (%)                                |                      |
| Administration                                       | 22 (50.0)            |
| Nursing                                              | 8 (18.2)             |
| Medicine                                             | 7 (15.9)             |
| Health Professions                                   | 5 (11.4)             |
| Research                                             | 2 (4.5)              |
| Estimated risk of exposure to SARS-CoV-2 (%)         |                      |
| Low                                                  | 38 (86.4)            |
| Medium                                               | 1 (2.3)              |
| High                                                 | 5 (11.4)             |
| Height, cm (mean (SD))                               | 167.18 (9.91)        |
| Weight, KG (mean (SD))                               | 74.09 (16.28)        |
| BMI, KG/m <sup>2</sup> (mean (SD))                   | 26.40 (4.98)         |
| Smoking history (%)                                  |                      |
| Current smoker                                       | 5 (11.4)             |
| Never smoked                                         | 29 (65.9)            |
| Past smoking                                         | 10 (22.7)            |
| Number of influenza vaccinations in past 3 years (%) |                      |
| 0                                                    | 9 (20.5)             |
| 1                                                    | 9 (20.5)             |
| 2                                                    | 13 (29.5)            |

|                                                       |                     |
|-------------------------------------------------------|---------------------|
| No. of participants                                   | 44                  |
| 3                                                     | 13 (29.5)           |
| Hypertension (%)                                      | 5 ( 11.4)           |
| Diabetes mellitus (%)                                 | 3 ( 6.8)            |
| Hypercholesterolemia (%)                              | 9 ( 20.5)           |
| Ischemic heart disease (%)                            | 1 ( 2.3)            |
| Solid malignancy in past 5 years (%)                  | 0                   |
| Hematological malignancy in past 5 years (%)          | 0                   |
| Pulmonary disease (%)                                 | 0                   |
| Renal disease (%)                                     | 1 ( 2.3)            |
| Liver disease (%)                                     | 1 ( 2.3)            |
| Hospitalizations in past 3 years (%)                  | 2 ( 4.5)            |
| Baseline serology, Index Value (median [IQR])         | 5.1 [3.8, 8.5]      |
| Time from 2nd dose to enrollment, days (median [IQR]) | 210 [207.7, 212.2]  |
| 2nd dose administration month (%)                     |                     |
| January 2021                                          | 43 (97.7)           |
| February 2021                                         | 1 (2.3)             |
| March 2021                                            | 0                   |
| April 2021                                            | 0                   |
| May 2021                                              | 0                   |
| Surveillance time, days (median [IQR])                | 12.50 [7.00, 19.50] |
| Number of RT-PCR tests per participant (median [IQR]) | 2.00 [1.00, 3.00]   |
| Number of tests performed during the study period (%) |                     |
| At least one test                                     | 39 (88.6)           |
| At least two tests                                    | 24 (54.5)           |
| Three or more tests                                   | 16 (36.6)           |

**eTable 3.** Baseline characteristics stratified by booster dose receipt status.

|                                               | Booster non-recipients | Booster recipients   | SMD   |
|-----------------------------------------------|------------------------|----------------------|-------|
| No. of participants                           | 278                    | 1650                 |       |
| Baseline serology, Index Value (median [IQR]) | 9.25 [5.41, 18.97]     | 5.42 [3.02, 9.60]    | 0.527 |
| Baseline serology > 5.5 index values (%)      | 205 (73.7)             | 814 (49.3)           | 0.518 |
| Age (median [IQR])                            | 42.00 [34.00, 51.00]   | 45.00 [36.00, 52.00] | 0.168 |
| Age group (%)                                 |                        |                      | 0.223 |
| <30                                           | 38 (13.7)              | 128 ( 7.8)           |       |
| 30-39                                         | 79 (28.4)              | 454 (27.5)           |       |
| 40-49                                         | 81 (29.1)              | 507 (30.7)           |       |
| 50-59                                         | 63 (22.7)              | 474 (28.7)           |       |
| 60+                                           | 17 ( 6.1)              | 87 ( 5.3)            |       |
| Sex                                           |                        |                      | 0.298 |
| Male sex (%)                                  | 49 (17.6)              | 498 (30.2)           |       |
| Female sex (%)                                | 229 (82.4)             | 1152 (69.8)          |       |
| 2nd dose administration month (%)             |                        |                      | 0.758 |
| January 2021                                  | 173 (62.2)             | 1518 (92%)           |       |
| February-May 2021 (%)                         | 105 (37.8)             | 132 ( 8.0)           |       |

**eFigure 1.** SARS-CoV-2 spread in Israel throughout the study period (marked in the shaded area). Data taken from Our World In Data.

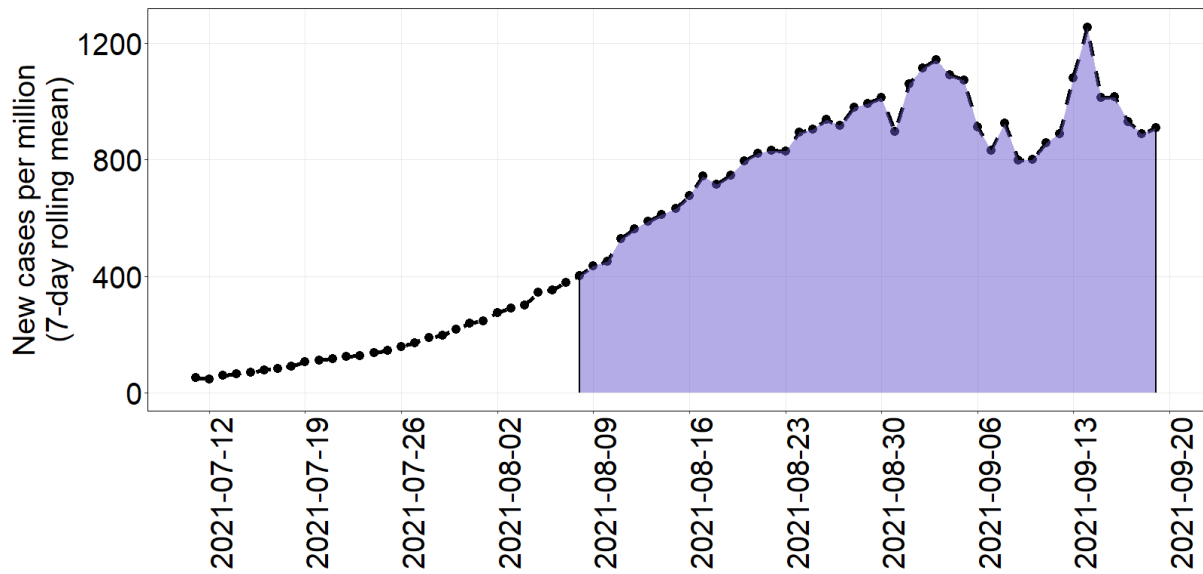

**eFigure 2.** Vaccine uptake over time in booster cohort.

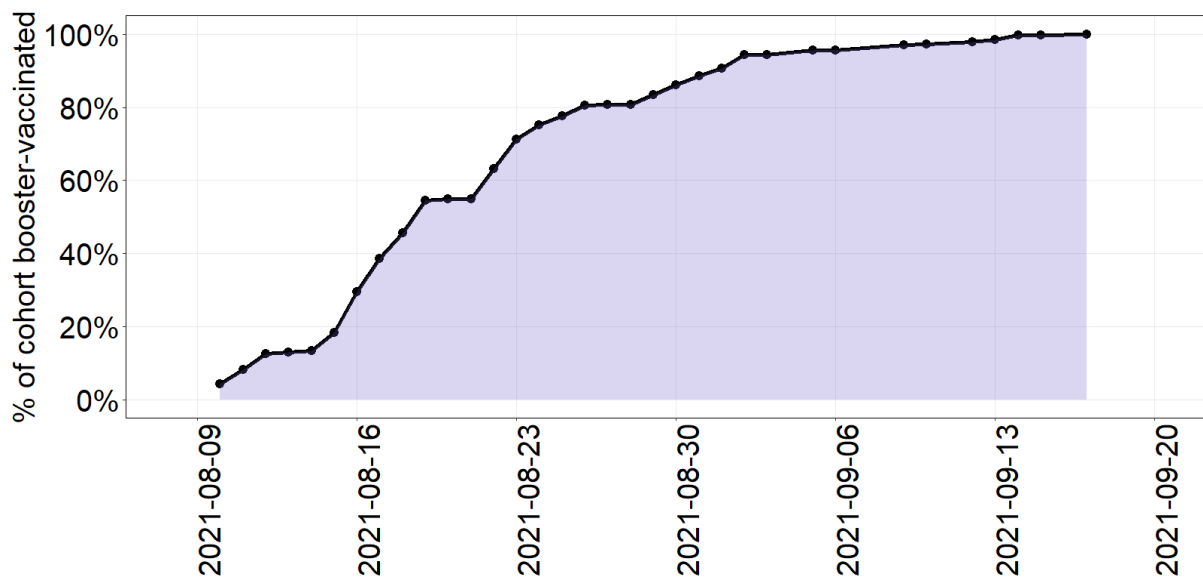

**eFigure 3.** Daily PCR test density (7-day rolling mean) in booster-immunized and non-immunized participants.

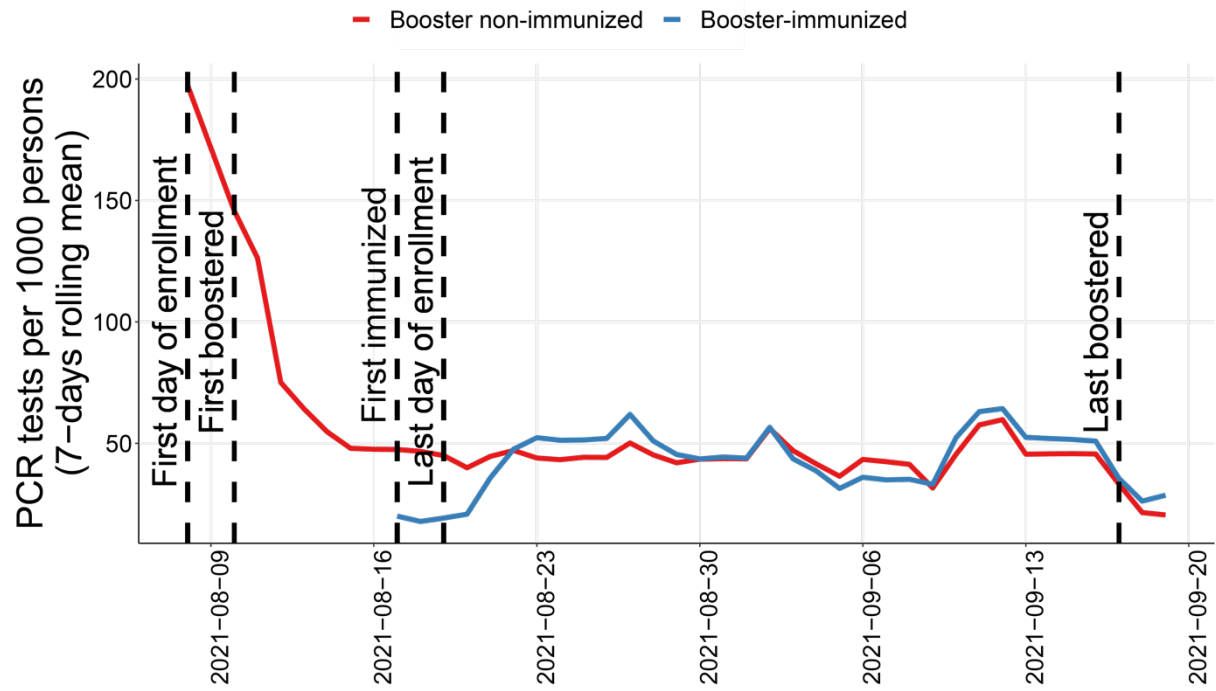

**eFigure 4.** Cumulative number of positive PCR tests over time from study initiation.

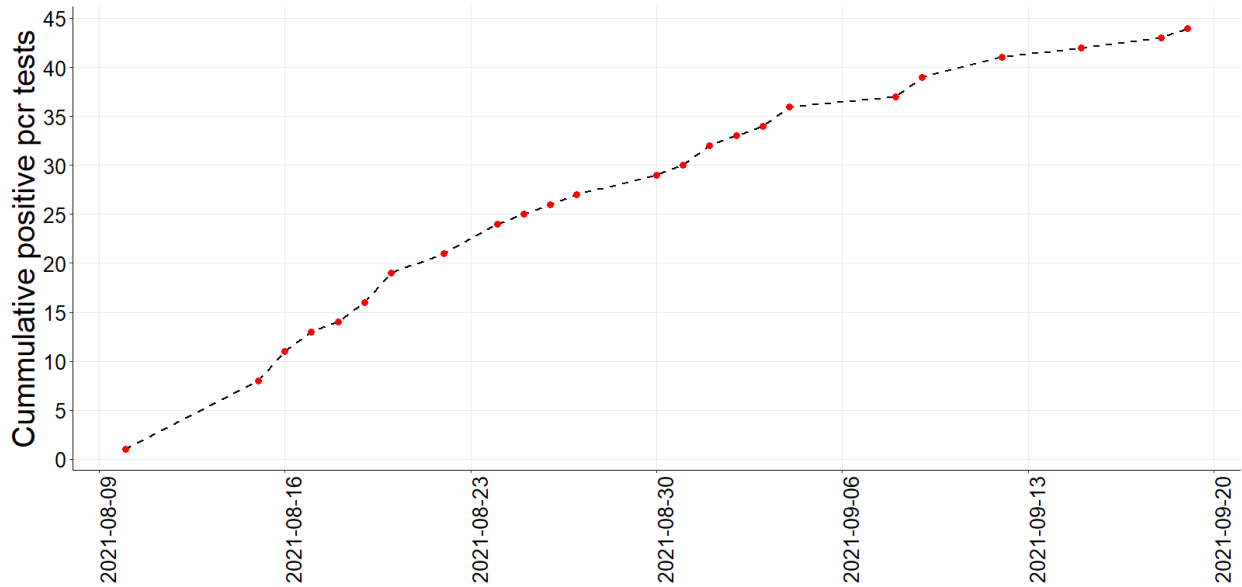



**eFigure 5.** Cox model diagnostics (shown only for covariates with statistically significant contribution). P value  $> 0.05$  indicates that the hazard in question is proportional.

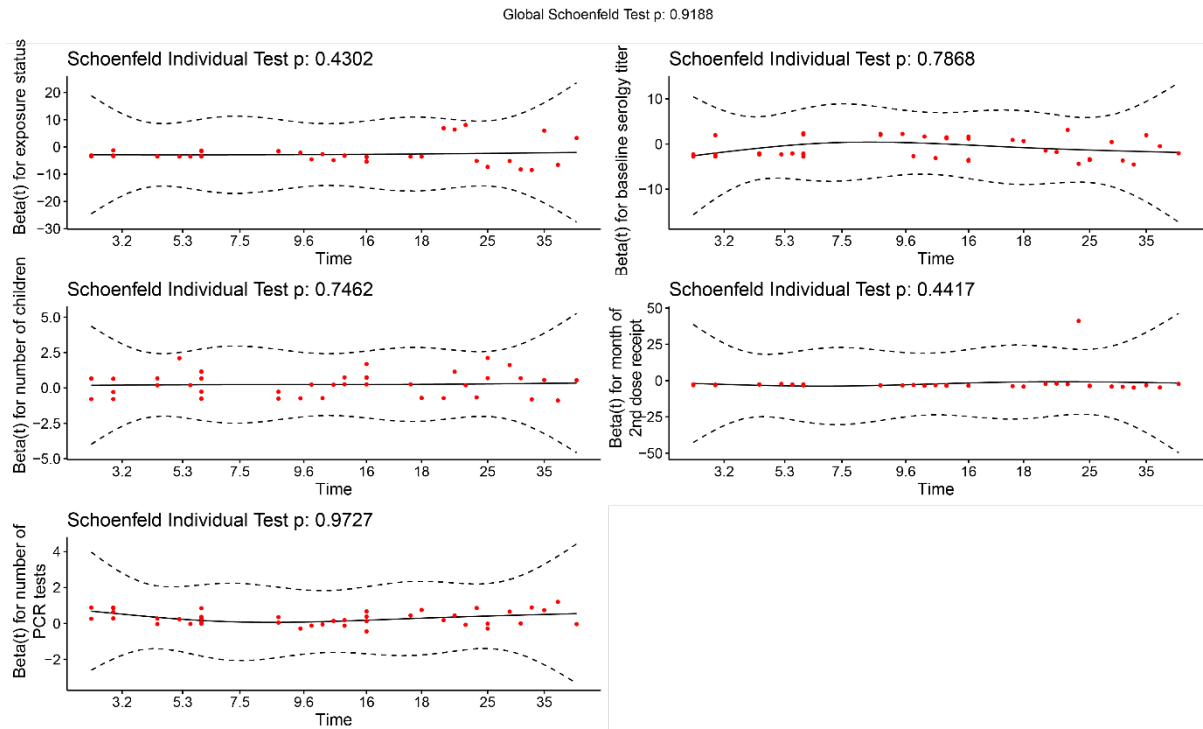

**eFigure 6.** Cumulative incidence of symptomatic SARS-CoV-2 infections.

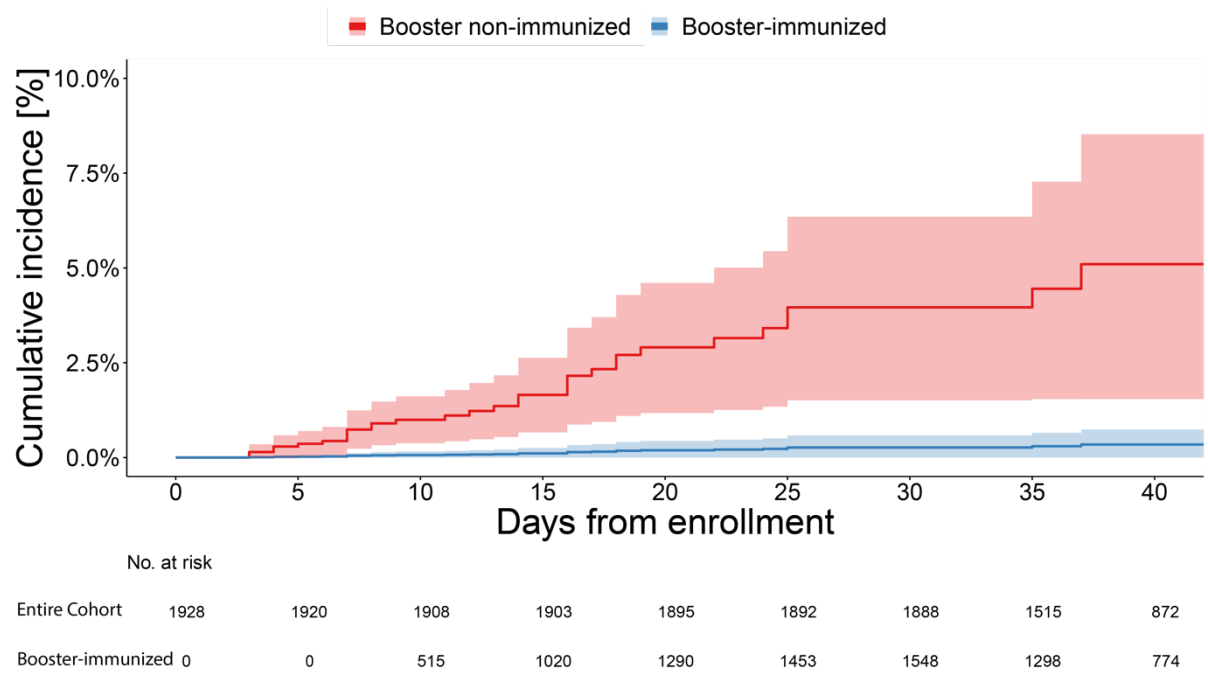

**eFigure 7.** Cumulative incidence of SARS-CoV-2 asymptomatic infection.

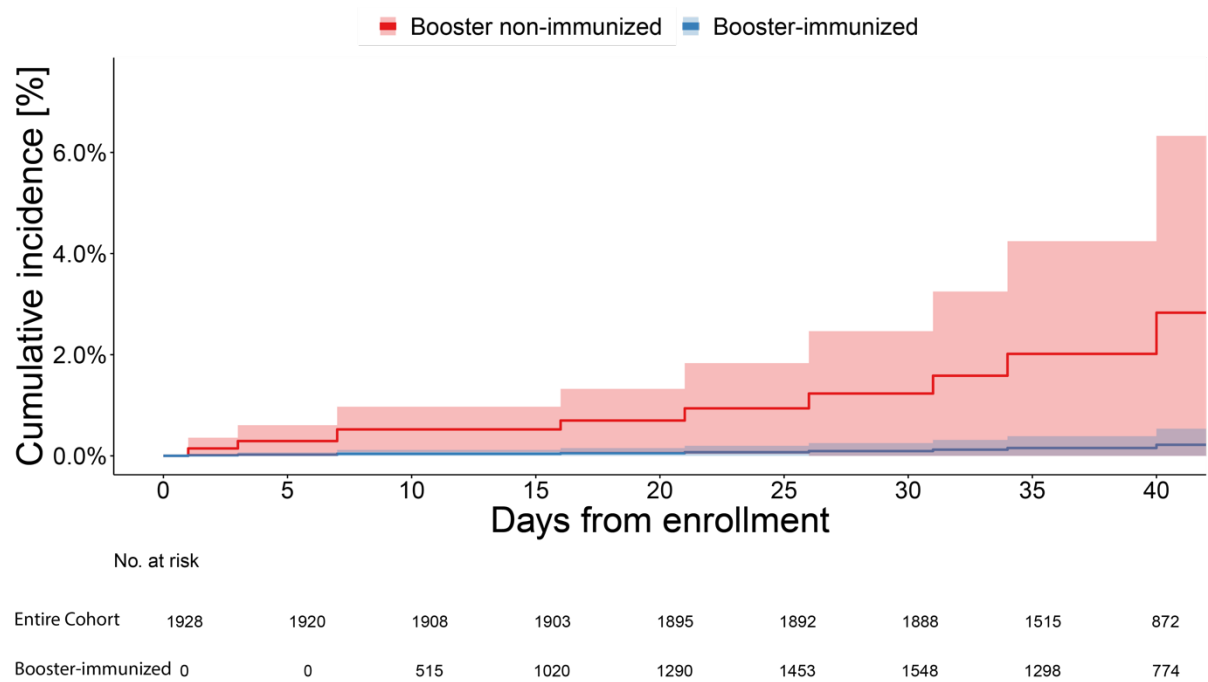

**DATA SHARING STATEMENT:**

The data that support the findings of this study, including study protocol and deidentified participant data might be made available following publication to researchers who provide a methodologically sound proposal, subject to applicable rules and regulations and following signing of a data access agreement. Requests should be addressed to the corresponding author.

**eReference**

1 Siemens Healthcare Diagnostics Inc. Understanding SARS-CoV-2 IgG Immunity Thresholds and the Process of Standardization. 2021.  
<https://cdn0.scrvt.com/39b415fb07de4d9656c7b516d8e2d907/b2406e708bf287e5/506564e9207f/Understanding-SARS-CoV-2-IgG-Immunity-Thresholds-and-the-Process-of-Standardization.pdf>.
